# Supplementary material for: Speciation of the proton in water-in-salt electrolytes
Source: Royal Society of Chemistry journal article supplement (doi:10.1039/d4fd00027g), 2024-01-01
Supplement: d4fd00027g1.pdf [file d4fd00027g1.pdf]

## Speciation of the proton in water-in-salt electrolytes

Kateryna Goloviznina,<sup>1,2, a)</sup> Alessandra Serva,<sup>1,2</sup> and Mathieu Salanne<sup>1,2,3</sup>

<sup>1)</sup>*Sorbonne Université, CNRS, Physicochimie des Électrolytes et Nanosystèmes Interfaciaux, F-75005 Paris, France*

<sup>2)</sup>*Réseau sur le Stockage Electrochimique de l'Energie (RS2E), FR CNRS 3459, 80039 Amiens Cedex, France*

<sup>3)</sup>*Institut Universitaire de France (IUF), 75231 Paris, France*

---

<sup>a)</sup>Electronic mail: [kateryna.goloviznina@sorbonne-universite.fr](mailto:kateryna.goloviznina@sorbonne-universite.fr)

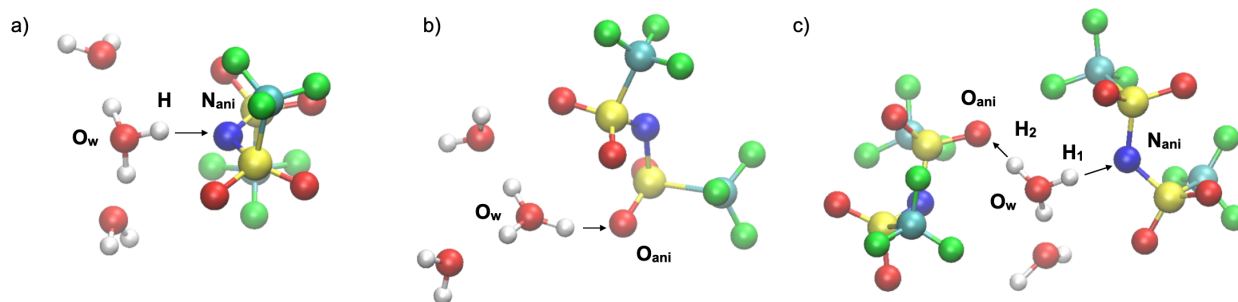

Figure S1. Initial configuration extracted from AIMD run (S-II) used to compute free energy profiles of proton transfer. The configurations represented in subfigures (a) and (c) were used to investigate the proton transfer from  $\text{H}_3\text{O}^+$  to the N atom of the  $\text{TFSI}^-$  anion, while subfigures (b) and (c) to the O atom of the anion.

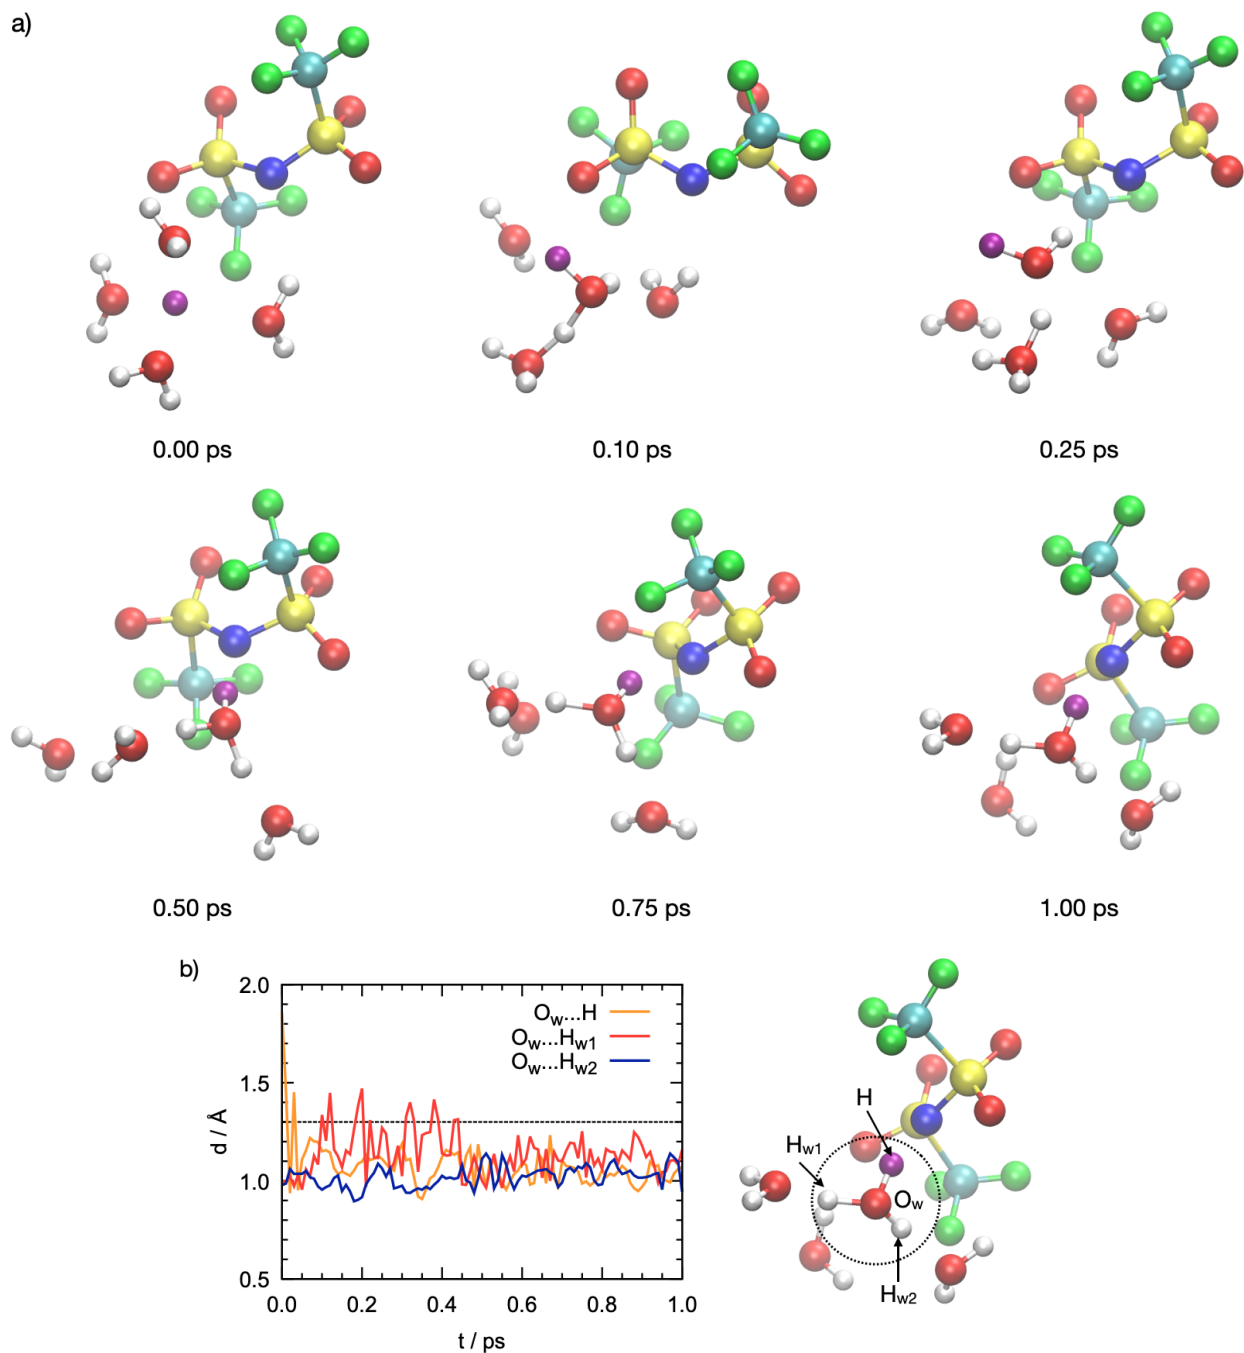

Figure S2. Equilibration of the S-II system: (a) Simulation snapshots revealing the environment of the proton (represented by a small purple sphere) as a function of time. (b) Time evolution of hydrogen–oxygen distances in the  $\text{H}_3\text{O}^+$  cation. The horizontal dashed line corresponds to the value of  $1.3 \text{ \AA}$  used for the proton speciation definition. Here, the equilibration time reaches  $0.45 \text{ ps}$  when a stable  $\text{H}_3\text{O}^+$  cation is formed.

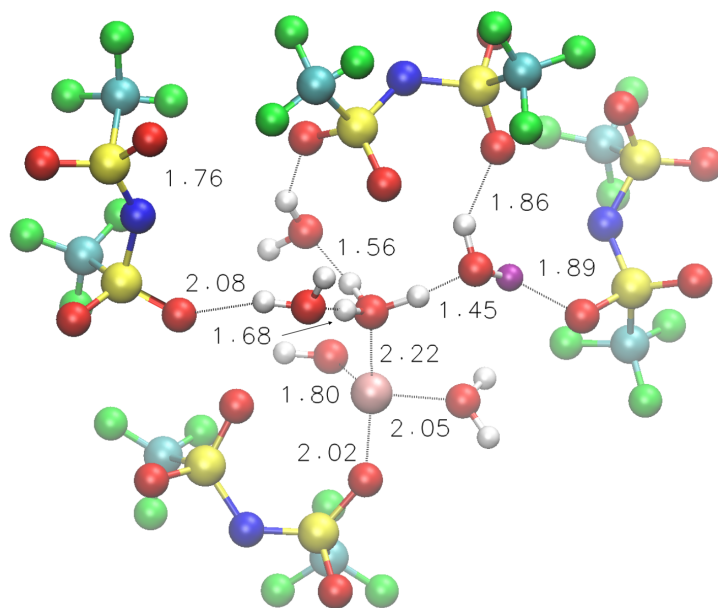

Figure S3. Simulation snapshot (S-V) revealing the local environment of the  $\text{H}_9\text{O}_4^+$  Eigen cation, which includes the local environment of lithium cation not shown in Figure 2b (4.1 ps frame).

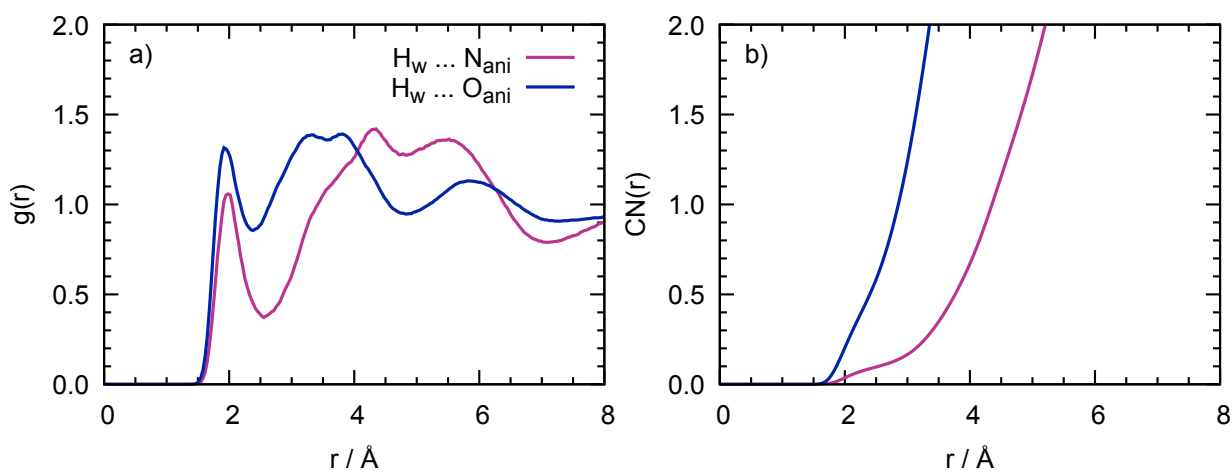

Figure S4. Radial distribution functions ( $g(r)$ ) and running coordination numbers (CN) of O and N atoms of the  $\text{TFSI}^-$  anion around  $\text{H}_w$  atoms of water molecules, obtained from the previously reported 70 ps AIMD trajectory of 21 *m* LiTFSI WiS.

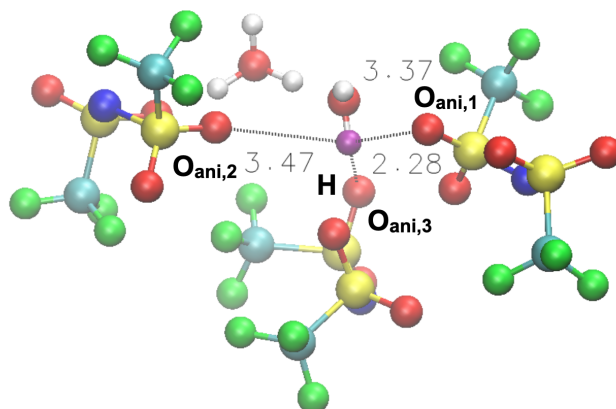

Figure S5. Simulation snapshot (at 5.1 ps, S-IV) illustrating the formation of a hydrogen bond between a water molecule and an oxygen atom of a third TFSI<sup>-</sup> anion, after moving away from the first and second anions, as shown in Figure 3c.

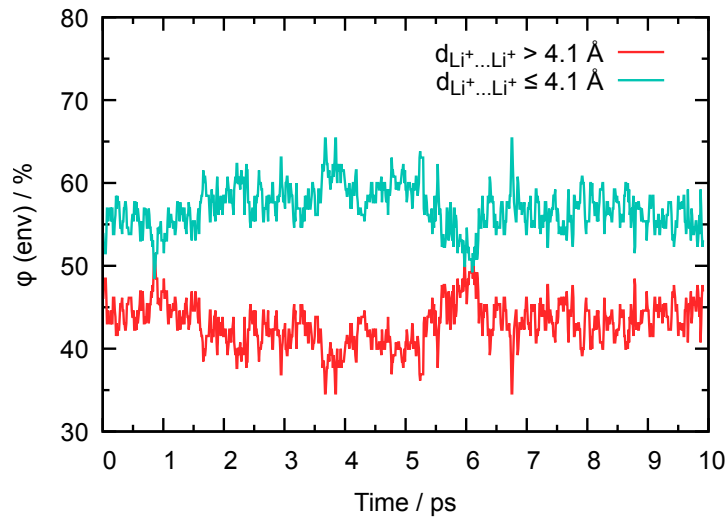

Figure S6. Time evolution of the fraction of the lithium cations ( $\phi(t)$ ) with a Li<sup>+</sup> ... Li<sup>+</sup> distance smaller or greater than 4.1 Å in system S-V with a single Li<sup>+</sup> ion in a nanochain substituted by a H<sup>+</sup>.

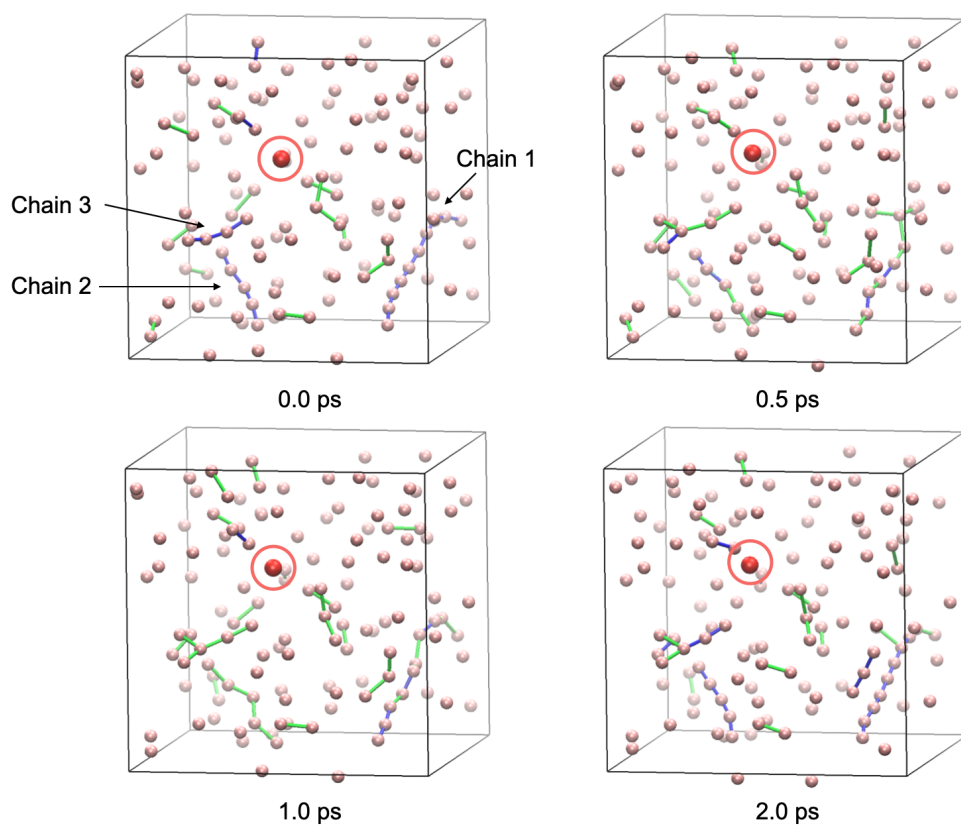

Figure S7. Simulation snapshots (S-III) revealing the evolution of lithium nanochains when a single  $\text{Li}^+$  cation is replaced by a proton (represented by a big red sphere in a red circle). The subfigure at 0.0 ps shows the starting configuration obtained from a previous 70 ps *ab initio* MD run with a replaced cation. Blue lines correspond to the  $\text{Li}^+ \dots \text{Li}^+$  distances smaller than  $3.0 \text{ \AA}$ , green lines to those larger than  $3.0 \text{ \AA}$  and smaller than  $4.1 \text{ \AA}$ , which are the first and second minima of the  $\text{Li}^+ \dots \text{Li}^+$  radial distribution function (Figure 6, red curve).
